# Supplementary material for: Crystallization and Temperature Driven Morphological Evolution of Bio-based Polyethylene Glycol-acrylic Rosin Polymer
Source: MDPI journal article supplement (doi:10.3390/polym11101684), 2019-10-15
Supplement: s1 [file s1]

### Supplementary Information

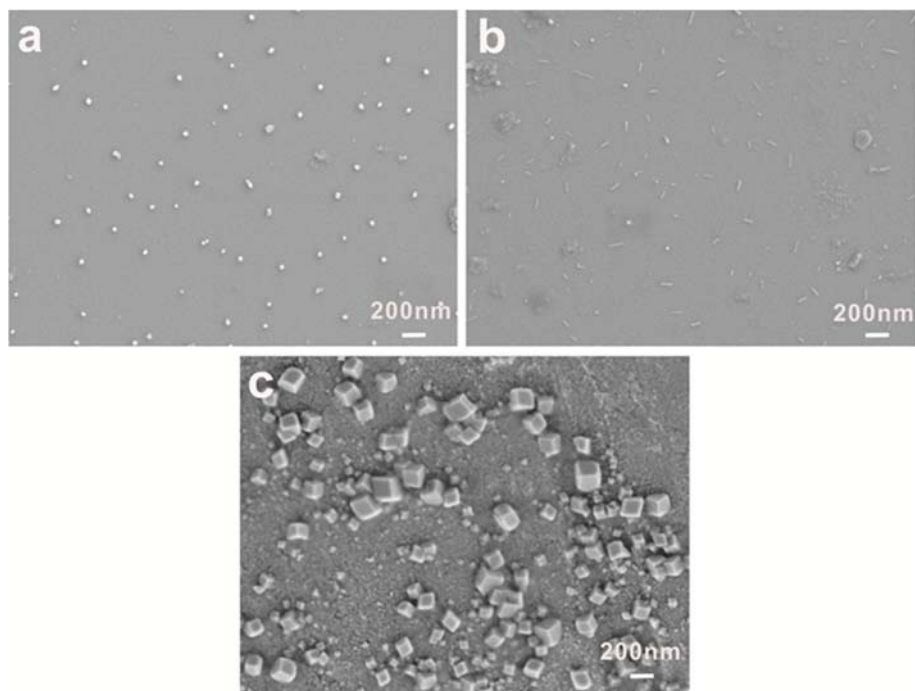

Figure S1. SEM images of 0.01 g L<sup>-1</sup> PEG-acrylic rosin polymer at (a) 25 °C, (b) 85 °C and (c) 5 °C respectively.
